# Supplementary material
Source: PubMed Central journal article supplement (PMC3718180)
Supplement: 1302504110_pnas.201302504SI.pdf [file 1302504110_pnas.201302504SI.pdf]

# Supporting Information

O'Donnell et al. 10.1073/pnas.1302504110

## SI Methods

**Sequence Analysis of Tetracycline-ORFeus Insertions.** Sequence reads were processed with phred and the fasta files were first aligned to the genome with blastall version 2.2.22 (mouse genome build mm9, 37.1) (1–3). All files containing mouse genomic DNA (gDNA) were aligned to each other to determine whether the entire construct had been sequenced and finally to the two inverse PCR (iPCR) primers. If the sequences overlapped in the expected configuration, the insertion site was determined. Perl scripts are available upon request.

**Quantitative Real-Time PCR.** All quantitative real-time PCR analysis was performed using the Step One Plus Real Time PCR system (Life Technologies). Analysis of ORF2 mRNA levels in tissues was performed by SYBR green analysis of cDNA samples.

Primers used for ORF2 were forward (5'-TCGGCAAGGAG-GAAGTGAAGATCAG-3') and reverse (5'-GCTCTTGTTC-TGTTGATCTTGTAG-3'); *Actin* forward (5'-CGGTTCCGAT-GCCCTGAGGCTCTT-3') and reverse (5'-CGTCACACTTCA-TGATGGAATTGA-3'). ORF2 expression was normalized to actin and represented relative to the animal treated with doxycycline during embryogenesis for each tissue. All SYBR green PCR assays were performed in triplicate.

**Blood Isolation.** Submandibular bleeding of mice was performed as previously described using a sterile lancet (4). Blood was harvested with EDTA K microvette tubes (Sarstedt) and immediately processed to isolate genomic DNA with the DNeasy Blood and Tissue Kit (Qiagen).

1. Altschul SF, Gish W, Miller W, Myers EW, Lipman DJ (1990) Basic local alignment search tool. *J Mol Biol* 215(3):403–410.
2. Ewing B, Green P (1998) Base-calling of automated sequencer traces using phred. II. Error probabilities. *Genome Res* 8(3):186–194.
3. Ewing B, Hillier L, Wendl MC, Green P (1998) Base-calling of automated sequencer traces using phred. I. Accuracy assessment. *Genome Res* 8(3):175–185.
4. Golde WT, Gollobin P, Rodriguez LL (2005) A rapid, simple, and humane method for submandibular bleeding of mice using a lancet. *Lab Anim (NY)* 34(9):39–43.

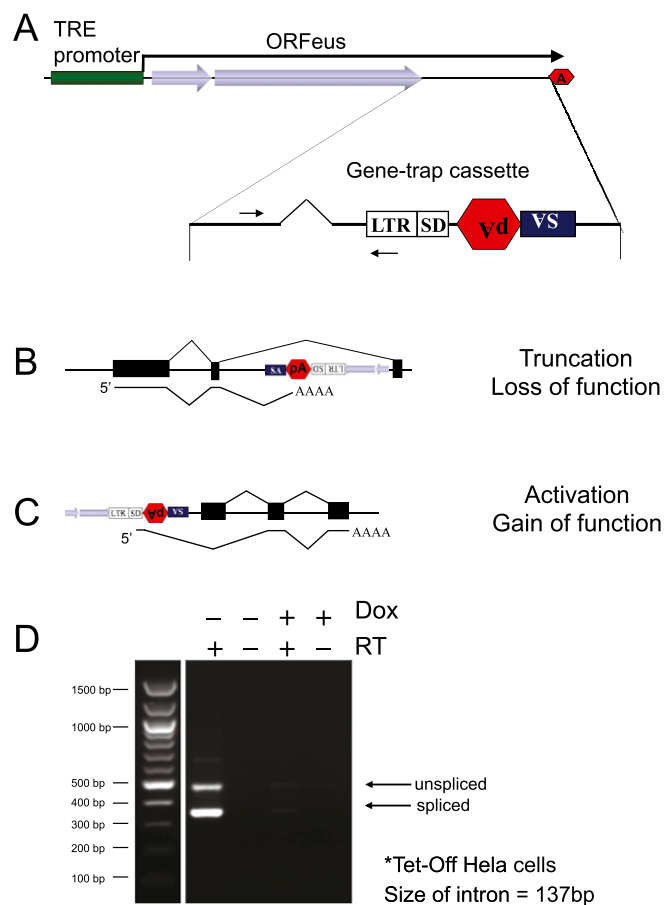

**Fig. S1.** Design of the tet-*ORFeus* gene trap transgene. *(A)* A mutagenic gene trap cassette is inserted in the 3' untranslated region of the tet-*ORFeus* element. A chimeric intron (inverted "V") and intron flanking primers (horizontal arrows) used to detect intron splicing are indicated. Red stop signs indicate polyadenylation signals; the one in the sense orientation is used to define the 3' end of the *ORFeus* transcript and the inverted one is part of the gene trap. LTR, long terminal repeat promoter from MSCV; SA, splice acceptor; SD, splice donor; pA, polyadenylation signal. *(B)* Schematic of an *ORFeus* gene trap insertion into an intron that results in mRNA truncation. *(C)* An *ORFeus* gene trap insertion upstream of a gene. Transcription from the MSCV 5'-LTR and splicing of the splice donor to a downstream exon is depicted, resulting in a gain of function allele. Note that a similar effect can be obtained by insertion into an intron; the result would be overexpression of a protein fragment, which might have a dominant negative phenotype. *(D)* RT-PCR analysis of the tet-*ORFeus* gene trap transgene 72 h after transfection into tet-OFF HeLa cells and treatment (+) or absence (-) of 1 mg/ml doxycycline. Intron flanking primers were used to assay for intron splicing. Size ladder and PCR products were run on the same gel but irrelevant lanes were removed for clarity (denoted by white space between ladder and gel).

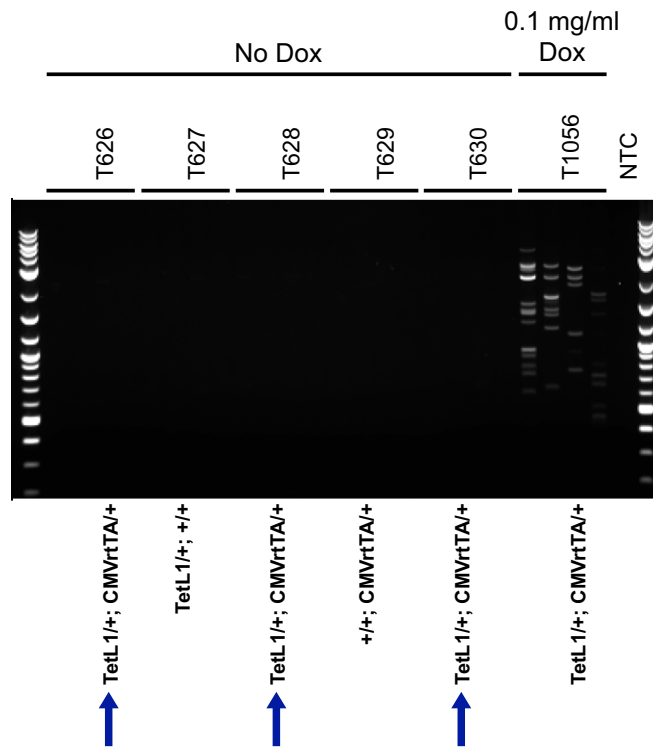

**Fig. S2.** No evidence for leaky *tet-ORFeus* transgene expression in vivo. Inverse PCR assay with tail genomic DNA isolated from line 058 animals that never received doxycycline (T626-T630). T1056, which received 0.1 mg/mL doxycycline during embryogenesis, serves as a positive control for the iPCR assay. Genotypes are labeled below the gel image. Blue arrows indicate double-transgenic animals lacking *tet-ORFeus* insertions.

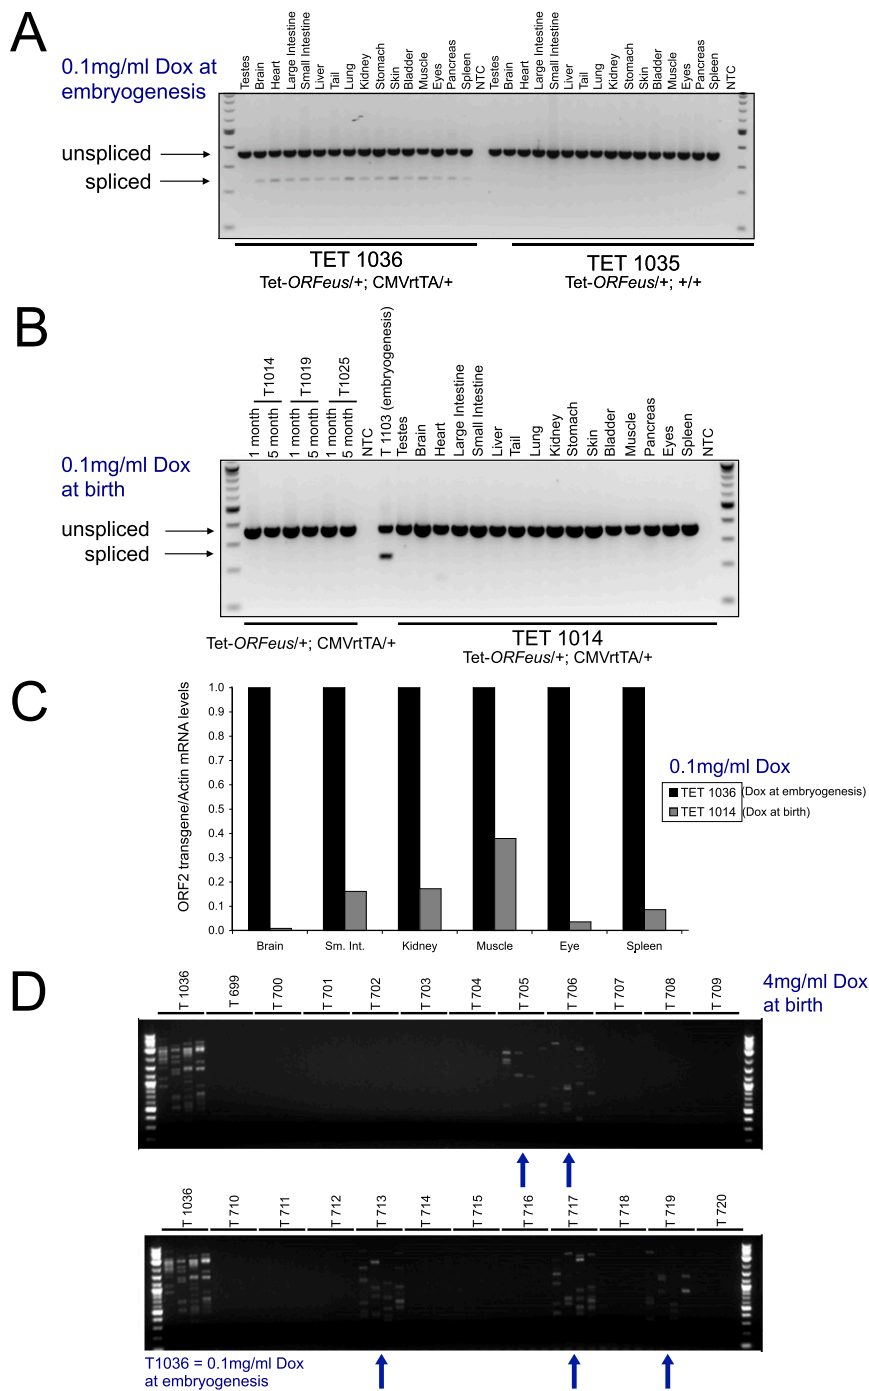

**Fig. 53.** Retrotransposition is less efficient when mice are treated with doxycycline postnatally compared with doxycycline treatment during embryogenesis. (A) Gene-trap splicing assay with gDNA isolated from double-transgenic (T1036) or single-transgenic (T1035) tissues when animals were administered doxycycline during embryogenesis. (B) Gene-trap splicing assay with gDNA isolated from tissues of double-transgenic animals given 0.1 mg/mL doxycycline at birth. Tail snips were isolated at 1 and 5 mo for double-transgenic mice T1014, T1019, and T1025. T1103, which was treated with doxycycline during embryogenesis, serves as a positive control. (C) Quantitative real-time PCR analysis of ORF2 mRNA relative to actin mRNA in tissues from a double-transgenic animal treated with doxycycline at birth (T1014). Data were normalized to the values obtained with T1036. (D) iPCR assay with tail gDNA isolated from animals given 4 mg/mL doxycycline at birth. T1036 received 0.1 mg/mL doxycycline during embryogenesis. Blue arrows highlight double-transgenic animals with *tet-ORFeus* insertions. T705 and T706 are line 058 animals; T713 is a line 095 animal; T717 and T719 are line 185 animals.

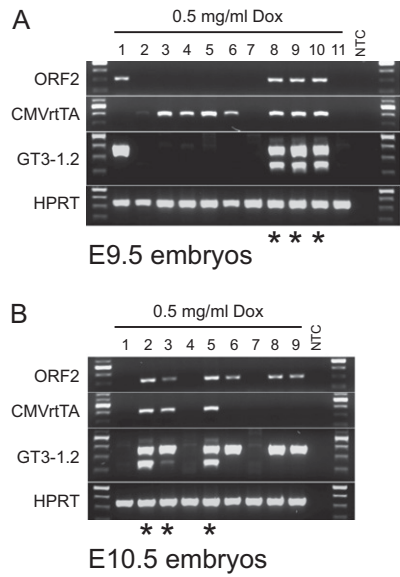

**Fig. 54.** Retrotransposition in E9.5–E10.5 embryos. Genotyping PCR (ORF2 and CMVrtTA) and gene-trap splicing assay (GT3-1.2) with gDNA isolated from E9.5 (A) and E10.5 (B) embryos. Animals were treated with 0.5 mg/mL doxycycline beginning at conception. Numbers represent individual embryos. Asterisks below the gel image indicate double-transgenic embryos. Hypoxanthine phosphoribosyltransferase 1 (HPRT) serves as a control for equal loading of template gDNA.

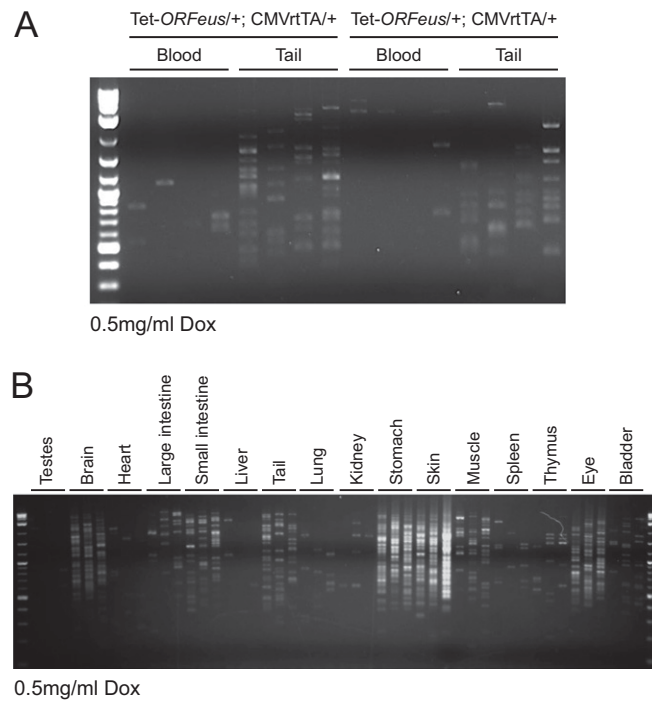

**Fig. 55.** Analysis of *ORFeus* insertions in blood and tail (A) and a panel of tissues (B) in double-transgenic line 095 animals treated with 0.5 mg/mL doxycycline during embryogenesis. Three to four independent iPCR assays were performed for each sample.

**Table S1. Copy number of tet-ORFeus transgenic lines**

| Line ID no. | Approximate copy no.* | No. of integration loci <sup>†</sup> | Retrotransposition activity <sup>‡</sup> |
|-------------|-----------------------|--------------------------------------|------------------------------------------|
| TET 058     | 50                    | 1                                    | Yes                                      |
| TET 095     | 1                     | 1                                    | Yes                                      |
| TET 185     | 10                    | 1                                    | Yes                                      |
| TET 161     | 15                    | 1                                    | No                                       |
| TET 162     | 5                     | 1                                    | No                                       |

\*Copy number was determined by quantitative Southern blotting.

<sup>†</sup>No. of integration loci was determined by Southern blotting.

<sup>‡</sup>Retrotransposition activity was determined by the presence of the “spliced” band in the intron-spanning PCR assay and by the iPCR assay.

**Table S2. Locations of cloned tet-ORFeus insertions**

| Chromosome | Integration site* | Orientation <sup>†</sup> | Position to gene | Gene name     | Gene description                                                         |
|------------|-------------------|--------------------------|------------------|---------------|--------------------------------------------------------------------------|
| X          | 3770631           | –                        | Intergenic       | Gm3706        | Predicted gene 3706                                                      |
| X          | 13531317          | +                        | Intergenic       | Cask          | Calcium/calmodulin-dependent serine protein kinase                       |
| X          | 15378435          | +                        | Intergenic       | AL732400.1    | microRNA                                                                 |
| X          | 30142600          | +                        | Intergenic       | Gm2777        | Predicted gene 2777                                                      |
| X          | 41543038          | –                        | Intergenic       | Dcaf12l2      | DDB1- and CUL4-associated factor 12-like 2                               |
| X          | 51674702          | –                        | Intergenic       | Gm14596       | X-linked lymphocyte-regulated protein PM1-like                           |
| X          | 51856780          | –                        | Intron 1         | Gm16430       | Predicted gene 16430                                                     |
| X          | 52110455          | +                        | Intergenic       | Slx1          | Slx-like 1                                                               |
| X          | 52111695          | –                        | Intergenic       | Gm14590       | X-linked lymphocyte-regulated protein PM1-like isoform 2                 |
| X          | 58841094          | –                        | Intergenic       | Ldoc1         | Leucine zipper, down-regulated in cancer 1                               |
| X          | 104471306         | +                        | Intron 3         | Gpr174        | G-protein-coupled receptor 174                                           |
| 1          | 7263236           | +                        | Intergenic       | Gm16899       | LincRNA gene                                                             |
| 1          | 10523786          | –                        | Intron 2         | Cpa6          | Carboxypeptidase A6                                                      |
| 1          | 12405021          | –                        | Intergenic       | Gm17644       | LincRNA gene                                                             |
| 1          | 141545449         | –                        | Intron 4         | Zcchc16       | Zinc-finger CCHC domain containing 16                                    |
| 1          | 147213431         | +                        | Intergenic       | LOC383570     | —                                                                        |
| 1          | 4996691           | –                        | Intron 2         | Rgs20         | Regulator of G protein signaling 20                                      |
| 2          | 44017964          | –                        | Intron 10        | Arhgap15      | Rho GTPase-activating protein 15                                         |
| 2          | 67472782          | +                        | Intergenic       | Xirp2         | Xin actin-binding repeat containing 2                                    |
| 2          | 70620018          | +                        | Intron 2         | Tlk1          | Tousled-like kinase 1                                                    |
| 2          | 109554330         | +                        | Intron 1         | Bdnf          | Brain-derived neurotrophic factor, isoform 2                             |
| 2          | 125700808         | –                        | Intron 1         | Galk2         | N-acetylgalactosamine kinase                                             |
| 3          | 19867094          | +                        | Intron 3         | Cp            | Ceruloplasmin isoform b precursor                                        |
| 3          | 117851146         | +                        | Intergenic       | Snx7          | Sorting nexin 7                                                          |
| 4          | 109231345         | –                        | Intergenic       | 4930522H14Rik | RIKEN cDNA 4930522H14 gene                                               |
| 4          | 117023793         | +                        | Intron 2         | Rnf220        | Ring-finger protein 220                                                  |
| 4          | 15498869          | –                        | Intergenic       | LOC100040095  | —                                                                        |
| 4          | 27750203          | +                        | Intergenic       | Epha7         | Eph receptor A7                                                          |
| 4          | 71396833          | –                        | Intergenic       | Tle1          | Transducin-like enhancer of split 1                                      |
| 4          | 23401989          | +                        | Intergenic       | Gm11884       | LincRNA gene                                                             |
| 4          | 9428016           | –                        | Intron 20        | Asph          | Aspartyl β-hydroxylase isoform 1                                         |
| 4          | 72963524          | –                        | Intergenic       | LOC433719     | Uncharacterized protein                                                  |
| 5          | 19211678          | +                        | Intron 2         | Magi2         | Membrane-associated guanylate kinase, WW and PDZ domain-containing 2     |
| 5          | 43493091          | –                        | Intergenic       | Cpeb2         | Cytoplasmic polyadenylation element-binding protein 2                    |
| 5          | 84058498          | +                        | Intergenic       | Tecr1         | Trans-2,3-enoyl-CoA reductase-like                                       |
| 5          | 149943955         | –                        | Intron 2         | 5730422E09Rik | LincRNA gene                                                             |
| 6          | 62931348          | +                        | Intergenic       | Arap2         | ArfGAP with RhoGAP domain, ankyrin repeat, and PH domain 2               |
| 6          | 104207079         | –                        | Intergenic       | Cntn6         | Contactin 6                                                              |
| 6          | 12763776          | –                        | Intergenic       | Thsd7a        | Thrombospondin, type I, domain-containing 7A                             |
| 6          | 18112294          | +                        | Intergenic       | Cftr          | Cystic fibrosis transmembrane conductance regulator                      |
| 6          | 39654832          | –                        | Intron 1         | Braf          | Braf-transforming gene                                                   |
| 6          | 6996997           | +                        | Intergenic       | Igkv7-33      | Ig kappa chain variable 7–33                                             |
| 7          | 74312280          | +                        | Intergenic       | Adamts17      | A disintegrin-like and metallopeptidase with thrombospondin type 1 motif |
| 7          | 103463658         | –                        | Intron 1         | Odz4          | Odd Oz/ten-m homolog 4                                                   |
| 7          | 111576512         | +                        | Intron 4         | Trim30        | Tripartite motif, protein 30                                             |

**Table S2. Cont.**

| Chromosome | Integration site* | Orientation† | Position to gene | Gene name     | Gene description                                     |
|------------|-------------------|--------------|------------------|---------------|------------------------------------------------------|
| 7          | 137533699         | -            | Intergenic       | Ate1          | Arginine-tRNA-protein transferase 1 isoform 1        |
| 7          | 5126969           | +            | Intergenic       | Vmn1r56       | Vomeronal 1 receptor 56                              |
| 7          | 91751276          | -            | Intron 1         | Fah           | Fumarylacetoacetate hydrolase                        |
| 7          | 94873398          | +            | Intron 1         | Grm5          | Glutamate receptor, metabotropic 5                   |
| 8          | 12363789          | +            | Intergenic       | Gm5607        | Predicted gene 5607                                  |
| 8          | 128728068         | -            | Intergenic       | Slc35f3       | Solute carrier family 35, member F3                  |
| 9          | 6797752           | -            | Intergenic       | Dync2h1       | Dynein cytoplasmic 2 heavy chain 1                   |
| 10         | 123125763         | +            | Intron 3         | Fam19a2       | Family with sequence similarity 19, member A2        |
| 10         | 71760018          | -            | Intergenic       | Zwint         | ZW10 interactor                                      |
| 12         | 7768155           | -            | Intergenic       | Apob          | Apolipoprotein B                                     |
| 12         | 78291911          | +            | Intergenic       | Fut8          | Fucosyltransferase 8                                 |
| 13         | 21329494          | +            | Intergenic       | Trnaa-agc     | Transfer RNA alanine                                 |
| 14         | 3159259           | +            | Intergenic       | 1700110I01Rik | RIKEN cDNA 1700110I01 gene                           |
| 14         | 5413413           | -            | Intron 6         | Gm3383        | Predicted gene 3383                                  |
| 14         | 6300145           | -            | Intergenic       | Gm3476        | Predicted gene 3476                                  |
| 14         | 30426474          | -            | Intron 2         | Cacna2d3      | Calcium channel, voltage-dependent, $\alpha$ 2 delta |
| 14         | 106730687         | +            | Intergenic       | Trim52        | Tripartite motif-containing 52                       |
| 15         | 62155742          | -            | Intergenic       | H2afy3        | H2A histone family, member Y3, noncoding RNA         |
| 16         | 12385854          | -            | Intergenic       | Shisa9        | Shisa homolog 9                                      |
| 16         | 20060381          | -            | Intergenic       | Klhl24        | Kelch-like 24                                        |
| 16         | 58359354          | +            | Intergenic       | 4930461C15Rik | LincRNA gene                                         |
| 16         | 84534838          | +            | Intergenic       | Mir155        | microRNA 155                                         |
| 16         | 89021359          | +            | Intergenic       | Krtap6-1      | Keratin-associated protein 6-1                       |
| 18         | 29241510          | -            | Intergenic       | 4930474G06Rik | RIKEN cDNA 4930474G06 gene                           |
| 19         | 24017501          | +            | Intron 10        | Apba1         | Amyloid $\beta$ (A4) precursor protein binding       |

LincRNA, long intergenic noncoding RNA.

\*The coordinate listed for each integration site is the first non-A base following the 3' end of the insertion or the first base located some distance (typically 1 kb) downstream from the integration site. This is because the polyA/3' flanking sequence was not reached for a number of iPCR products. The coordinates are derived from build mm9, 37.1 of the mouse reference genome sequence.

†The orientation is the direction of tet-ORFeus transcription relative to the reference sequence.

**Table S3. PCR cycling conditions for genotyping assays**

| Number of cycles | ORF2          | GT3-1.2       | HPRT          | CMVrtTA       |
|------------------|---------------|---------------|---------------|---------------|
| 1x               | 95 °C, 2 min  | 95 2 min      | 95 °C, 2 min  |               |
| 35x              | 95 °C, 30 s   | 95 °C, 30 s   | 95 °C, 30 s   |               |
|                  | 60 °C, 30 s   | 55 °C, 30 s   | 57.5 °C, 30 s |               |
|                  | 72 °C, 30 s   | 72 °C, 30 s   | 72 °C, 30 s   |               |
| 1x               | 72 °C, 10 min | 72 °C, 10 min | 72 °C, 10 min |               |
|                  | 4 $\infty$    | 4 $\infty$    | 4 $\infty$    |               |
| 1x               |               |               |               | 94 °C, 2 min  |
| 30x              |               |               |               | 94 °C, 30 s   |
|                  |               |               |               | 57 °C, 30 s   |
|                  |               |               |               | 72 °C, 30 s   |
| 1x               |               |               |               | 72 °C, 10 min |
|                  |               |               |               | 4 $\infty$    |

Amplicon sizes: ORF2 = 307 bp; GT3-1.2 = 369 bp (unspliced), 232 bp (spliced); HPRT = 340 bp; and CMVrtTA = 400 bp. min = minutes, s = seconds.

**Table S4. PCR reaction conditions for Tet-ORFeus genotyping (in  $\mu\text{L}$ )**

| Components                       | 1×    |
|----------------------------------|-------|
| <b>ORF2, GT3-1.2, HPRT</b>       |       |
| H <sub>2</sub> O                 | 17.35 |
| 10× buffer                       | 2.5   |
| dNTP mix                         | 2.0   |
| 10 $\mu\text{M}$ forward primer  | 1.0   |
| 10 $\mu\text{M}$ reverse primer  | 1.0   |
| Ex Taq polymerase                | 0.15  |
| DNA template                     | 1.0   |
| Total                            | 25    |
| <b>CMVrtTA</b>                   |       |
| H <sub>2</sub> O                 | 17    |
| DMSO                             | 1.5   |
| 10× buffer                       | 2.5   |
| dNTP Mix                         | 2.5   |
| 100 $\mu\text{M}$ forward primer | 0.25  |
| 100 $\mu\text{M}$ reverse primer | 0.25  |
| Ex Taq polymerase                | 0.15  |
| DNA template                     | 1.0   |
| Total                            | 25.15 |

Amplicon sizes: ORF2 = 307 bp; GT3-1.2 = 369 bp (unspliced), 232 bp (spliced); HPRT = 340 bp; and CMVrtTA = 400 bp.

**Table S5. Tet-ORFeus genotyping primers**

| Primer name                 | Primer sequence           | bp              |
|-----------------------------|---------------------------|-----------------|
| smORF2 forward primer       | AAGGAGGAAGTGAAGATCAGCCTGT | 307             |
| smORF2 reverse primer       | TCCTTGATCTCCTTCTTCAGGCTCT |                 |
| GT3-1.2 forward primer      | CTAGTCCTGCAGGCCAAAAT      | 369 (unspliced) |
| GT3-1.2 reverse primer      | TCTGGGGACCATCTGTTCTT      | 232 (spliced)   |
| HPRT control forward primer | CTTCTTGTCACTCCCACTTTTCC   | 340             |
| HPRT control reverse primer | CACATCCTTCATTTCAGGTGTCACT |                 |
| CMVrtTA forward primer      | GTGAAGTGGGTCCGCGTACAG     | 400             |
| CMVrtTA reverse primer      | GTACTCGTCAATTCCAAGGGCATCG |                 |

**Table S6. Cycling conditions for iPCR**

| Number of cycles | iPCR                     |
|------------------|--------------------------|
| 1×               | 94 °C, 2 min             |
| 10×              | 94 °C, 15 s              |
|                  | 70 (−0.5 °C/cycle), 30 s |
|                  | 72 °C, 60 s              |
| 25×              | 94 °C, 15 s              |
|                  | 65 °C, 30 s              |
|                  | 72 °C, 60 s              |
| 1×               | 72 °C, 7 min             |
|                  | 4 $\infty$               |

**Table S7. Reaction conditions for iPCR (in  $\mu\text{L}$ )**

| Components                      | 1×    |
|---------------------------------|-------|
| H <sub>2</sub> O                | 34.95 |
| 10× Buffer                      | 5.0   |
| dNTP Mix                        | 5.0   |
| 10 $\mu\text{M}$ Forward primer | 1.9   |
| 10 $\mu\text{M}$ Reverse primer | 1.9   |
| Ex Taq HS polymerase            | 0.25  |
| DNA (from conc. ligation rxn)   | 1.0   |
| Total                           | 50    |

Conc., concentrated; rxn, reaction.
